# Supplementary material for: Reconstructing the Phylogeny ofCapsosiphon fulvescens(Ulotrichales, Chlorophyta) from Korea Based onrbcL and 18S rDNA Sequences
Source: Hindawi journal article supplement (doi:10.1155/2016/1462916), 2016-01-01
Supplement: f1 [file 1462916.f1.pdf]

**Supplementary data 1.** *rbcL* and 18S rDNA sequences.

***rbcL* Sequences**

*Capsosiphon fulvescens* (Jindo) (994 bp)

agcaggaactggcttcaaagctggtgtaaaagactaccgttaacttactacacacctgattatcaagtaaaagatactgatatttagctgactccgatgac  
acctcaaccagggtgactgcagaagaagctggctgtagctgctgaatcatcaaccggaactggactacagtatggactgatggttaaacatcttt  
agaccgtataaaggacgtgttatgacatcgaacctgtagctggtgaagataaccaatattgcttatattgcttaccattagactatttgaagaaggtct  
gtaacaaacctatttactcaattgtaggtaacgttttgattaaagctttacgtgctttacgtttagaagattfacgtgtccaccagcatacactaaacattc  
caaggtcctccacacgggattcaggtagaacgtgacaaactaaacaaatattgctgctggtctattaggtgtacaattaaacaaaattaggtatactcatt  
agcaatttactgctgtaacaatgatcttttattacacattcaccgtgcaatgcacgctgtaattgaccgtcaacgtaacatggtattcactccgtgtctagct  
aaaattctacgtatgcagggggtgaccacttactctggtactgtttaggtaaaactagaaggtgaacgtgaaattactttagatttcgtagatctaagcgt  
gatgactatattgaaaaagaccgtagctggtgatttacttcacacaagactgggttacttctctggtactatgccagtagcatcggggggtatccacgtat  
ggcacatgccagcactagtggaatctttgggagaggctgtttacaattcgggggggtactttaggtcaccagggggtaagctccagggggcag  
ctgctaaccgggtagctttagaagcagtgtactcaagctggtaacgaaggtcgtga

*Capsosiphon fulvescens* (Koheung) (1,174 bp)

agcaggaactggcttcaaagctggtgtaaaagactaccgttaacttactacacacctgattatcaagtaaaagatactgatatttagctgactccgatgac  
acctcaaccagggtgactgcagaagaagctggctgtagctgctgaatcatcaaccggaactggactacagtatggactgatggttaaacatcttt  
agaccgtataaaggacgtgttatgacatcgaacctgtagctggtgaagataaccaatattgcttatattgcttaccattagactatttgaagaaggtct  
gtaacaaacctatttactcaattgtaggtaacgttttgattaaagctttacgtgctttacgtttagaagattfacgtgtccaccagcatacactaaacattc  
caaggtcctccacacgggattcaggtagaacgtgacaaactaaacaaatattgctgctggtctattaggtgtacaattaaacaaaattaggtttatcagcta  
aaaactacgggctgcccgtttacaatgtttctacaaagatgatgaaaactaaactccccaccctttatgccttggcgtgaccgtttctattcctagcaga  
agccattaccaatcctcagctgaaactggtgaagftaaaggtcactactaaatgcaacagctggtacttgaagaaatgatgtccgtgcagaattgcg  
aaagatttaggtgtccaattattatgcatgactacctacaggtggtttactgcgaatactcattagcaatttactgctgtaacaatggtcttttattacacattc  
accgtgcaatgcacgctgtaattgaccgtcaacgtaacctggtattcactccgtgttctagctaaaattctacgtatgcagggggtgaccacttactct  
ggtactgttaggtaaaactagaaggtgaacgtgaaattactttaggttctgtagatctaagcgtgatgactatattgaaaaagaccgtagctggtgatttac  
ttcacacaagactgggttacttctctggtactatgccagtagcatctggtggtatccacgtatggcacatgccagcactagttgaaatctttggtgatgatgc  
ttgtttaccattcgggtggtgg

*Capsosiphon fulvescens* (Wando) (1,284 bp)

agcaggaactggcttcaagctggtgtaaagattactatttaacttattacacgcctgattatcaagtaaaagatactgatattttagctgcgttccgatgactc  
ctcaaccaggagtagctgcagaagaagctggtgctgctggtgctgaatcatcaaccggaactggactactgatggactgatggttaacatctttaga  
tcggtataaaggacgttggttacgacattgaaccattaggagaagacgaccaatattgcttatattgcttaccattagacttattgaagaaggttctgtaaca  
aacctatttacttcaattgtaggtaacgtttttggattaaagctttacgtgctttacgtttagaagattacgtgttccaccagcatacactaaaacattccaaggt  
cctccacacgggattcaggtagaacgtgacaaactaaacaatatggctggtgcttattaggtgtacaattaaccaaattaggttaccaaaattcggttt  
atcagctaaaaactacgggcgtgccgtttacgaacgtttacgcgggtggtttagactttacaaaagatgatgaaaacgtaaacacacaccatttatgcgttgg  
cgtgaccgtttcttattcgtagcagaagcaatttacaatctcaagctgaaactggtgaagttaaaggtcactacttaaatgcaacagctggfacttgtgaag  
aaatgatgttccgtgcagaatttgcgaaagatttaggtgtccaattattatgcatgactacattacaggtgggtttactgcgaatacttcattagcaattactgt  
cgtaacaatggcttttattacacattcaccgtgcaatgcacgctgtaattgaccgtcaacgtaacctgggtattcacttccgtgttctagctaaaattctacgta  
tgtcaggggggtgaccacttacactctggtactgtttaggtaactagaaggtgaacgtgaaacttttaggttcgtagatctaatgcgtgatgactatattg  
aaaaagaccgtagctggttatttacttcacacaagactgggttctacttctggtactatgccagtagcatctggtggtatccacgtatggcacatgccagc  
actagtgaaatctttggtgatgatgcttgttacaattcgggtgggtacttttaggtcacccatggggtaatgctccaggtgcagctgtaaccgtgtagcttt  
agaagcatgtactcaagctcgtaacg

*Capsosiphon fulvescens* (Jangheung) (1,258 bp)

agcaggaactggcttcaagctggtgtaaagactaccgtttaaacttactacacacctgattatcaagtaaaagatactgatattttagctgcattccgatgct  
acctcaaccagggtgtagctgcagaagaagctggtgctgcagtagctgctgaatcatcaaccggaactggactacagtaggactgatggttaacatcttt  
agaccgttataaaggacgttggatgacatcgaacctgtagctgggtaagataaccaatattgcttatattgcttaccattagacttattgaagaaggttct  
gtaacaaacctatttacttcaattgtaggtaacgtttttggattaaagctttacgtgctttacgtttagaagattfacgtgttccaccagcatacactaaaacattc  
caaggctctccacacgggattcaggtagaacgtgacaaactaaacaatatggctggtgcttattaggtgtacaattaaccaaattaggtttatcagcta  
aaaactacgggcgtgccgtttacaatgtttcttacaagaatgatgaaaacgtaaacacacaccatttatgcgtgggcgtgaccgtttcttattcgtagca  
gaagcaatttacaatctcaagctgaaactggtgaagttaaaggtcactacttaaatgcaacagctggfacttgtgaagaaatgatgttccgtgcagaattg  
cgaaagatttaggtgtccaattattatgcatgactacattacaggtgggtttactgcgaatacttcattagcaattactgtcgaacaatggcttttattacaca  
ttcaccgtgcaatgcacgctgtaattgaccgtcaacgtaacctgggtattcacttccgtgttctagctaaaattctacgtatgcagggggtgaccacttac  
tctggtactgtttaggtaactagaaggtgaacgtgaaacttttaggtttcgtagatctaatgcgtgatgactatattgaaaagaccgtagctcggggatt  
tacttcacacaagactgggttctacttctggtactatgccagtagcatctggtggtatccacgtatggcacatgccagcactagtggaaatctttggggatg  
aggcttgttacaattcgggtgggtacttttaggtcacccatggggtaatgctccaggtgcagctgtaaccgtgtagctttagaagcaggtactcaagctg  
gtaac

## 18S rDNA Sequences

*Capsosiphon fulvescens* (Jindo) (1,227 bp)

gcaggcgcgcaattaccaatcctgacacagggaggtagtacaataaatatc gatactgggccttcgggtccggaattggaatgagtacaatctaaat  
ccctaacgaggatccattggagggcaagtctggtgccagcagccgcggaattccagctccaatagcgtatattaaagttgtgcagttaaaaagctcgt  
gttgatttcgggtgggtaccgccggtctccctttgggtatgtactggcgtggcccgccttctgccggggacgatctcctgggcttaactgtccgggaat  
cggagtcggcgtactttgagtaaattagagtgttcaaaagcaagcctacgctctgaatataatagcatgggataaacacgacaggactctggcctatcgt  
gttggtctgtaggaccggagtaatgattaagaggacagtcggggcattcgtattccattgtcagagggtgaattcttgatttatggaagacgaacatct  
gcgaaagcattgtcaaggatgtttcattgatcaagaacgaaagttgggggctcgaagacgattagataccgtcgtagtctcaaccataaacgatgccga  
ctggggattggcggatgtttgtgatgactccgccagcaccttatgagaGggttccggggggagtatggtcgaaggctgaaactaaaggaattgacg  
gaagggcaccaccaggcgtggagcctgcggcttaatttgactcaaacacgggaaaacttaccaggtccagacataggaaggattgacagattgatagctc  
ttcttgattctgtgggtggtgcatggccggtcttagttggtgggtgccttgcaggttgattccggtaacgaacgagacctcagcctgctaaatagtg  
cgattgctttggcagttggcccgtcttagaggactgtggcgtctagccaatggaagtatgaggcaataacaggtctgtgatgcccttagatgttctgg  
gccgcacgcgcgtacactgatacgttcaacaagttcctaggccgaaaggtccgggtaactttgaaaccgtatcgtgatggggatagaacattgcaatta  
ttgttcttaacgaggaatgcctagtaagcgtgagtcacatctcgcgttgattacgtcccttgcctttgtacacaccgccgctcctaccgattgaaactg  
gctggtgaa

*Capsosiphon fulvescens* (Koheung) (1,291 bp)

gcaggcgcgcaattaccaatcctgacacagggaggtagtacaataaatatccatactgggccttcgggtccggaattggaatgagtacaatctaaat  
ccctaacgaggatccattggagggcaagtctggtgccagcagccgcggaattccagctccaatagcgtatattaaagttgtgcagttaaaaagctcgt  
gttgatttcgggtgggtaccgccggtctccctttgggtatgtactggcgtggcccgccttctgccggggacgatctcctgggcttaactgtccgggaat  
cggagtcggcgtactttgagtaaattagagtgttcaaaagcaagcctacgctctgaatataatagcatgggataaacacgacaggactctggcctatcgt  
gttggtctgtaggaccggagtaatgattaagaggacagtcggggcattcgtattccattgtcagagggtgaattcttgatttatggaagacgaacatct  
gcgaaagcattgtcaaggatgtttcattgatcaagaacgaaagttgggggctcgaagacgattagataccgtcgtagtctcaaccataaacgatgccga  
ctagggattggcggatgtttgtgatgactccgccagcaccttatgagagggttccggggggagtatggtcgaaggctgaaactaaaggaattgacg  
gaagggcaccaccaggcgtggagcctgcggcttaatttgactcaaacacgggaaaacttaccaggtccagacataggaaggattgacagattgatagctc  
ttcttgattctgtgggtggtgcatggccggtcttagttggtgggtgccttgcaggttgattccggtaacgaacgagacctcagcctgctaaatagtg  
cgattgctttggcagttggcccgtcttagaggactgtggcgtctagccaatggaagtatgaggcaataacaggtctgtgatgcccttagatgttctgg  
gccgcacgcgcgtacactgatacgttcaacaagttcctaggccgaaaggtccgggtaactttgaaaccgtatcgtgatggggatagaacattgcaatta  
ttgttcttaacgaggaatgcctagtaagcgtgagtcacatctcgcgttgattacgtcccttgcctttgtacacaccgccgctcctaccgattgaaactg

gctggtagaggtcggattggagcttggctaggttctagccctgattccgagaagttcttfaaccctc

*Capsosiphon fulvescens* (Wando) (1,284 bp)

gcaggcgcgcaaattaccaatcctgacacagggaggtagtgacaataaatatcaatacagggccttcgggtccggtaattggaatgagtacaatctaaa  
tccttaacgaggatccattggagggcaagtctggtgccagcagccgcggaattccagctccaatagcgtatatttaagttggtgcagttaaaaagctcgt  
agttggatttcgggtgggtaccgccggtctcccttgggtatgtactggcgtggcccgccttgctgccggggagcatctctgggcttaactgtccgggaa  
tcggagtcggcgatgttactttgagtaaattagagtggtcaagcaagcctacgctctgaatataatagcatgggataacacgacaggactctggcctatcg  
tgttggtctgtaggaccggagtaatgattaagagggacagtcggggcattcgtattccattgtcagaggtgaaattcttggattatggaagacgaacatct  
gcgaaagcattgtcaaggatgtttcattgatcaagaacgaaagttgggggctcgaagacgattagataccgtcgtagtctcaaccataaacgatgccga  
ctagggttggcggatgtttgttggatgactccgccagcaccttatgagaaatcaaaagtttgcTgactccgccagcaccttatgagaaatcaaaagtttt  
gggttccgggggagatggtcgaaggctgaaactaaaggaattgacggaagggcaccaccaggcgtggagcctgcggcttaattgactcaaac  
gggaaaacttaccaggtccagacataggaaggattgacagattgatagctcttcttgattctgtgggtggtgcatggccgttcttagttgggtggtgc  
cttgcaggttgattccggtaacgaacgagacctcagcctgctaaatagtgacgattgcttggcagttggcccgttcttagaggactgttggcgtctag  
ccaatggaagtatgaggcaataacaggtctgtgatgcccttagatgttctggccgcacgcgcgctacactgatacgtcaacaagttcctagccgaaa  
ggtccgggtaatcttgaaccgtatcgtgatgggatagaacattgcaattattgttctcaacgaggaatgcctagtaagcgtgagtcacatctcgcgtt  
gattacgtcccttgccttgtacacaccgccctcctaccgattgaacgtgctggtgaag

*Capsosiphon fulvescens* (Jangheung) (1,240 bp)

gcaggcgcgcaaattaccaatcctgacacagggaggtagtgacaataaatatcattactgggccttcgggtccggtaattggaatgagtacattctaaat  
cccttaacgaggatccattggagggcaagtctggtgccagcagccgcggaattccagctccaatagcgtatatttaagttggtgcagttaaaaagctcgt  
gttggatttcgggtgggtaccgccggtctcccttgggtatgtactggcgtggcccgccttgctgccggggagcatctctgggcttaactgtccgggaa  
cggagtcggcgatgttactttgagtaaattagagtggtcaagcaagcctacgctctgaatataatagcatgggataacacgacaggactctggcctatcgt  
gttggctgtaggaccggagtaatgattaagagggacagtcggggcattcgtattccattgtcagaggtgaaattcttggattatggaagacgaacatct  
gcgaaagcattgtcaaggatgtttcattgatcaagaacgaaagttgggggctcgaagacgattagataccgtcgtagtctcaaccataaacgatgccga  
ctagggttggcggatgtttgttggatgactccgccagcaccttgacggaagggcaccaccaggcgtggagcctgcggcttaattgactcaaacggga  
aaacttaccaggtccagacataggaaggattgacagattgatagctcttcttgattctgtgggtggtgcatggccgttcttagttgggtgggtgccttgc  
caggttgattccggtaacgaacgagacctcagcctgctaaatagtgacgattgcttggcagttggcccgttcttagaggactgttggcgtctagccaat  
ggaagtatgaggcaataacaggtctgtgatgcccttagatgttctggccgcacgcgcgctacactgatacgtcaacaagttcctagccgaaaggtcc  
gggtaatcttgaaccgtatcgtgatgggatagaacattgcaattattgttctcaacgaggaatgcctagtaagcgtgagtcacatctcgcgttgattac  
gtcccttgccttgtacacaccgccctcctaccgattgaacgtgctggtgaagagttcggattggagcttggctaggttcttagccctgattccga

gaagttctttaaccctc
